# Supplementary material
Source: publisher site journal article supplement (https://www.dovepress.com/article/419235)
Supplement: Supplementary file 1 [file get_supplementary_file.php]

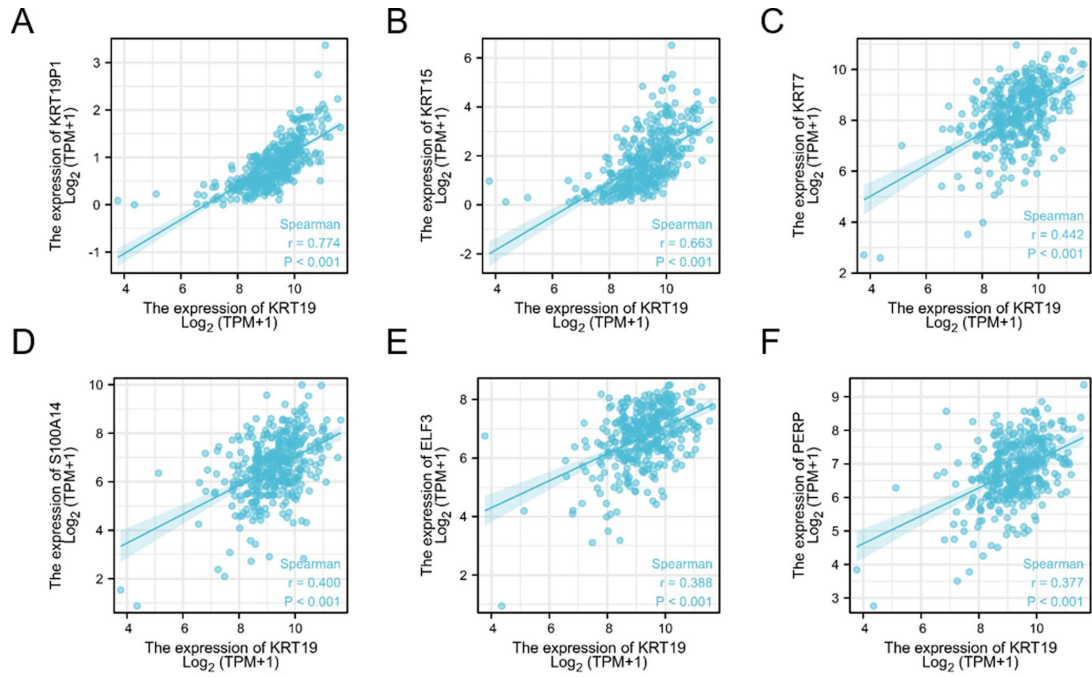

**Figure S1.** Correlation analysis of the top 6 positively correlated genes of KRT19. (A) KRT19P1, (B) KRT15, (C) KRT7, (D) S100A14, (E) ELF3, (F) PERP

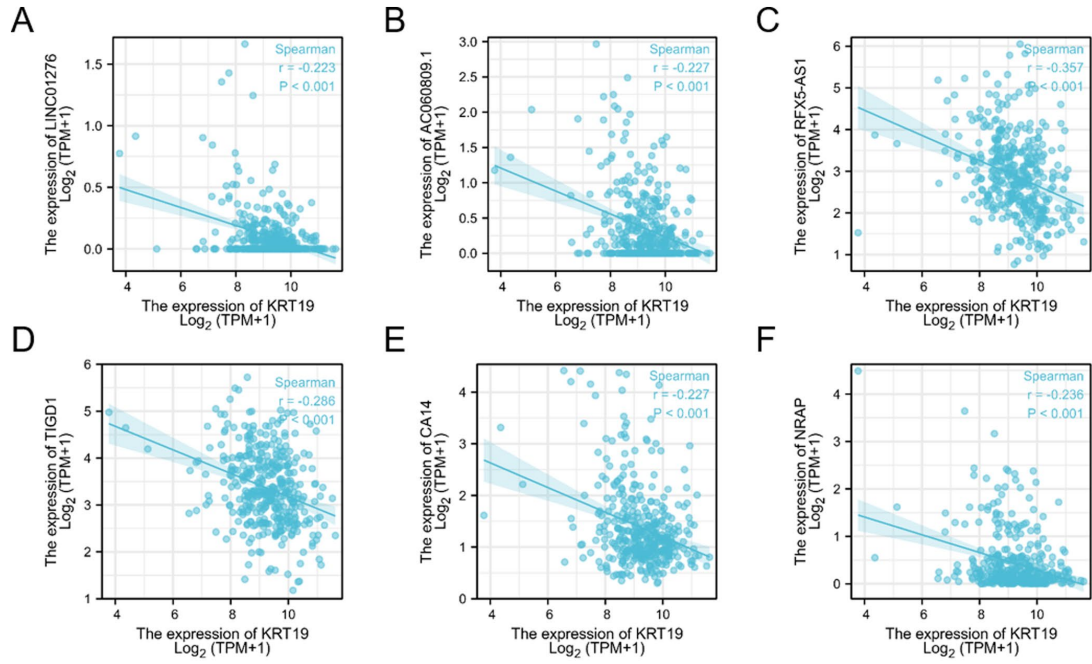

**Figure S2.** Correlation analysis of the top 6 negatively correlated genes of KRT19. (A) LINC01276, (B) AC060809.1, (C) RFX5-AS1, (D) TIGD1, (E) CA14, (F) NRAP

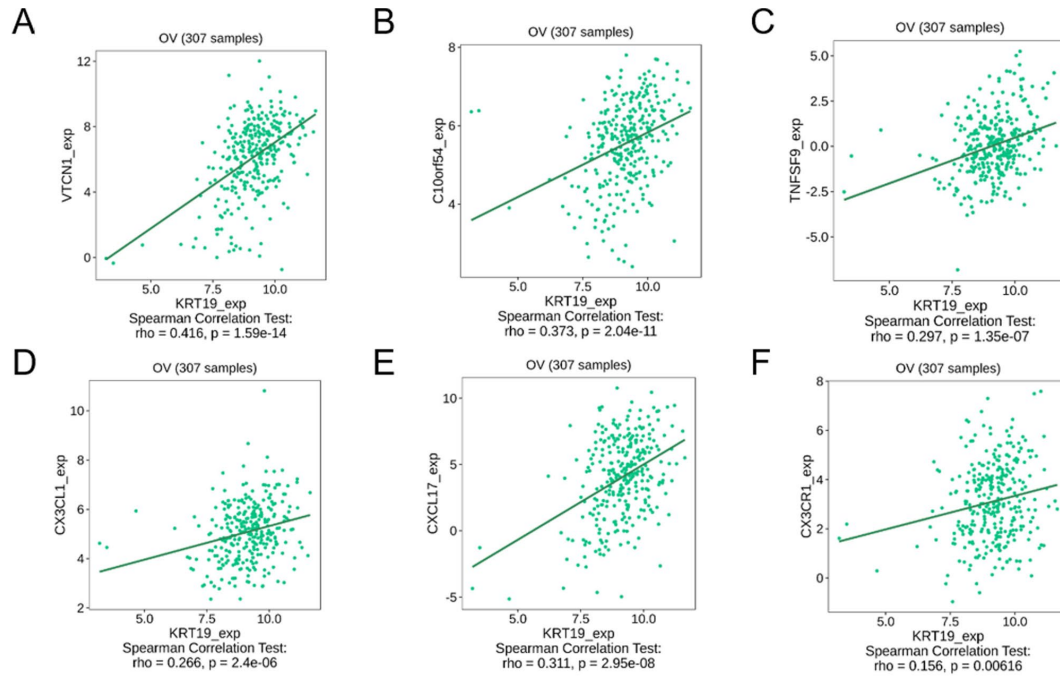

**Figure S3.** KRT19 expression was significantly positively associated with (A) VTCN1, (B) C10orf54, (C) TNFSF9, (D) CXC3CL1, (E) CXCL17, (F) CX3CR1
